# Supplementary material for: A “turn-on” fluorescent sensor for cytosine in aqueous media based on diamino-bridged biphenyl acrylonitrile
Source: Royal Society of Chemistry journal article supplement (doi:10.1039/d0nj05098a), 2020-12-10
Supplement: d0nj05098a1.pdf [file d0nj05098a1.pdf]

## Supporting Information

### 1. General

The chemical reagents were supplied by commercial company (Aladdin LLC). The organic solvents were treated by standard anhydrous procedure before use. Pre-coated glass plates were applied for TLC analysis. Column chromatography was carried out on silica gel (200-300 mesh). NMR spectra were performed in the solvent of CDCl<sub>3</sub> or DMSO-d<sub>6</sub> on the Bruker-ARX 600 instrument at 26 °C. Bruker mass spectrometer was used for recording the MS spectra. Elemental analyses were analysed on Vario EL III Elemental Analyzer. UV-Vis spectra were measured on Varian UV-Vis spectrometer. Fluorescence spectra were examined on the Hitachi F-4500 spectrometer. Compound **1** and **2a-2c** were prepared according to the literatures, respectively. (*Organic & Biomolecular Chemistry*, 2017, **15**, 6006-6013, and *J. Incl. Phenom. Macrocycl. Chem.*, 2010, **67**, 49-54).

## 2. The synthetic process and characteristic spectra.

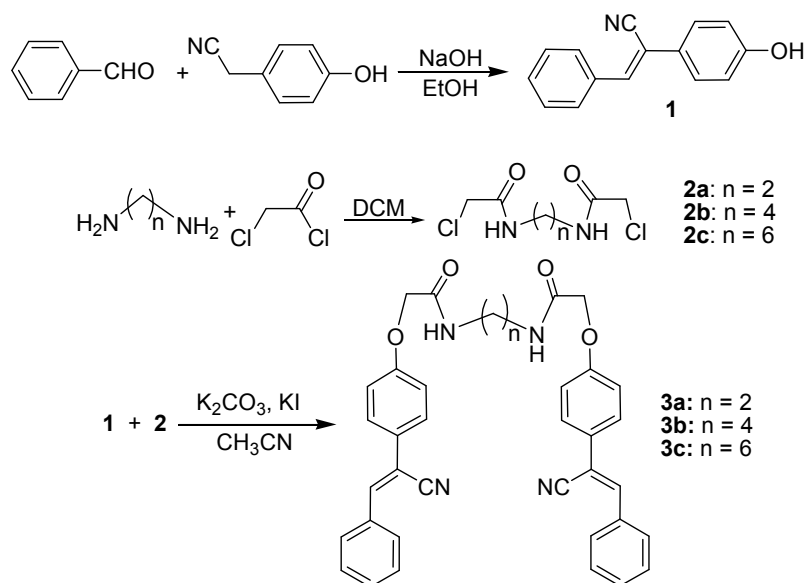

**Scheme S1** The synthesis of compounds **3a**, **3b** and **3c**

### 2.1 Synthesis of compounds **3a**, **3b** and **3c**.

Under  $\text{N}_2$  atmosphere, the mixture of compound **1** (0.22 g, 1 mmol) and compound **2a** (**2b** or **2c**) (0.5 mmol) was stirred and refluxed in 20 mL of dry MeCN for 24 h with dry  $\text{K}_2\text{CO}_3$  (0.41g, 3 mmol) and KI (0.10g, 0.6 mmol) as catalyst. The disappearance of starting materials was examined by TLC detection. Subsequently, 30 mL of HCl solution (1 M) and 30 mL of  $\text{CH}_2\text{Cl}_2$  were added in reaction system under stirring. Then the mixture was partitioned and the organic layer was dried by anhydrous  $\text{MgSO}_4$ . The organic layer was further concentrated under reduced pressure. The residue was purified by rapid column chromatography (eluent:  $\text{CH}_2\text{Cl}_2$ ). compounds **3a**, **3b** and **3c** were obtained as pale yellow solid in yields of 72%, 70% and 75%, respectively.

Compound **3a**:  $^1\text{H}$  NMR (400 MHz,  $\text{DMSO-d}_6$ )  $\delta$ ppm: 3.28 (s, 4H,  $\text{NCH}_2$ ), 4.54(s, 4H,  $\text{OCH}_2$ ), 7.09 (d, 4H,  $J = 8.0\text{Hz}$ , ArH), 7.29 (d, 4H,  $J = 8.0\text{Hz}$ , ArH), 7.43-7.53 (m, 4H, CH and ArH), 7.69 (d, 4H,  $J = 8.0\text{Hz}$ , ArH), 7.90 (m, 4H, ArH), 8.26(s, 2H, NH);  $^{13}\text{C}$  NMR (100 MHz,  $\text{DMSO-d}_6$ )  $\delta$ ppm: 168.30, 158.92, 141.36, 134.35, 130.74, 130.42, 130.05, 129.38, 129.04, 127.65, 115.85, 110.36, 67.41, 55.34; MALDI-MS ( $\text{C}_{36}\text{H}_{30}\text{N}_4\text{O}_4$ )  $[\text{M}]^+$ : Calcd.: 582.227. found:605.195  $[\text{M}+\text{Na}]^+$ ; Anal. calcd for  $\text{C}_{36}\text{H}_{30}\text{N}_4\text{O}_4$ : C 74.21, H 5.19, N 9.62; found C 74.25, H 5.22, N 9.56%.

Compound **3b**:  $^1\text{H}$  NMR (400 MHz,  $\text{DMSO-d}_6$ )  $\delta$ ppm: 1.44(s, 4H,  $\text{CH}_2$ ), 3.14 (s, 4H,  $\text{NCH}_2$ ), 4.54(s, 4H,  $\text{OCH}_2$ ), 7.09 (d, 4H,  $J = 8.0\text{Hz}$ , ArH), 7.29 (d, 4H,  $J = 8.0\text{Hz}$ , ArH), 7.47-7.54 (m, 4H, CH and ArH), 7.71 (d, 4H,  $J = 8.0\text{Hz}$ , ArH), 7.90 (t, 4H,  $J = 4.0\text{Hz}$ , ArH), 8.18(s, 2H, NH);  $^{13}\text{C}$  NMR (100

MHz, DMSO-d<sub>6</sub>) δppm: 167.64, 158.81, 141.45, 134.01, 130.76, 130.41, 130.06, 129.39, 129.05, 127.67, 115.85, 110.39, 67.49, 55.34, 26.96; MALDI-MS (C<sub>38</sub>H<sub>34</sub>N<sub>4</sub>O<sub>4</sub>) [M]<sup>+</sup>: Calcd.: 610.258. found: 611.061[MH]<sup>+</sup>; Anal. calcd for C<sub>38</sub>H<sub>34</sub>N<sub>4</sub>O<sub>4</sub>: C 74.73, H 5.61, N 9.17; found C 74.76, H 5.65, N 9.11%.

Compound **3c**: <sup>1</sup>H NMR (400 MHz, DMSO-d<sub>6</sub>) δppm: 1.23(bs, 4H, CH<sub>2</sub>), 1.41(bs, 4H, CH<sub>2</sub>), 3.12 (bs, 4H, NCH<sub>2</sub>), 4.50(s, 4H, OCH<sub>2</sub>), 7.09 (d, 4H, *J* = 8.0Hz, ArH), 7.29 (d, 4H, *J* = 8.0Hz, ArH), 7.47-7.54 (m, 4H, CH and ArH), 7.71 (d, 4H, *J* = 8.0Hz, ArH), 7.91 (t, 4H, *J* = 4.0Hz, ArH), 8.11(s, 2H, NH); <sup>13</sup>C NMR (100 MHz, DMSO-d<sub>6</sub>) δppm: 167.60, 158.77, 141.43, 133.96, 130.69, 130.40, 130.06, 129.37, 129.05, 127.65, 115.97, 113.11, 67.27, 56.52, 29.44, 26.42; MALDI-MS (C<sub>40</sub>H<sub>38</sub>N<sub>4</sub>O<sub>4</sub>) [M]<sup>+</sup>: Calcd.: 638.289. found: 638.976[M]<sup>+</sup>, 661.293[M+Na]<sup>+</sup>; Anal. calcd for C<sub>40</sub>H<sub>38</sub>N<sub>4</sub>O<sub>4</sub>: C 75.21, H 6.00, N 8.77; found C 75.27, H 6.04, N 8.69%.

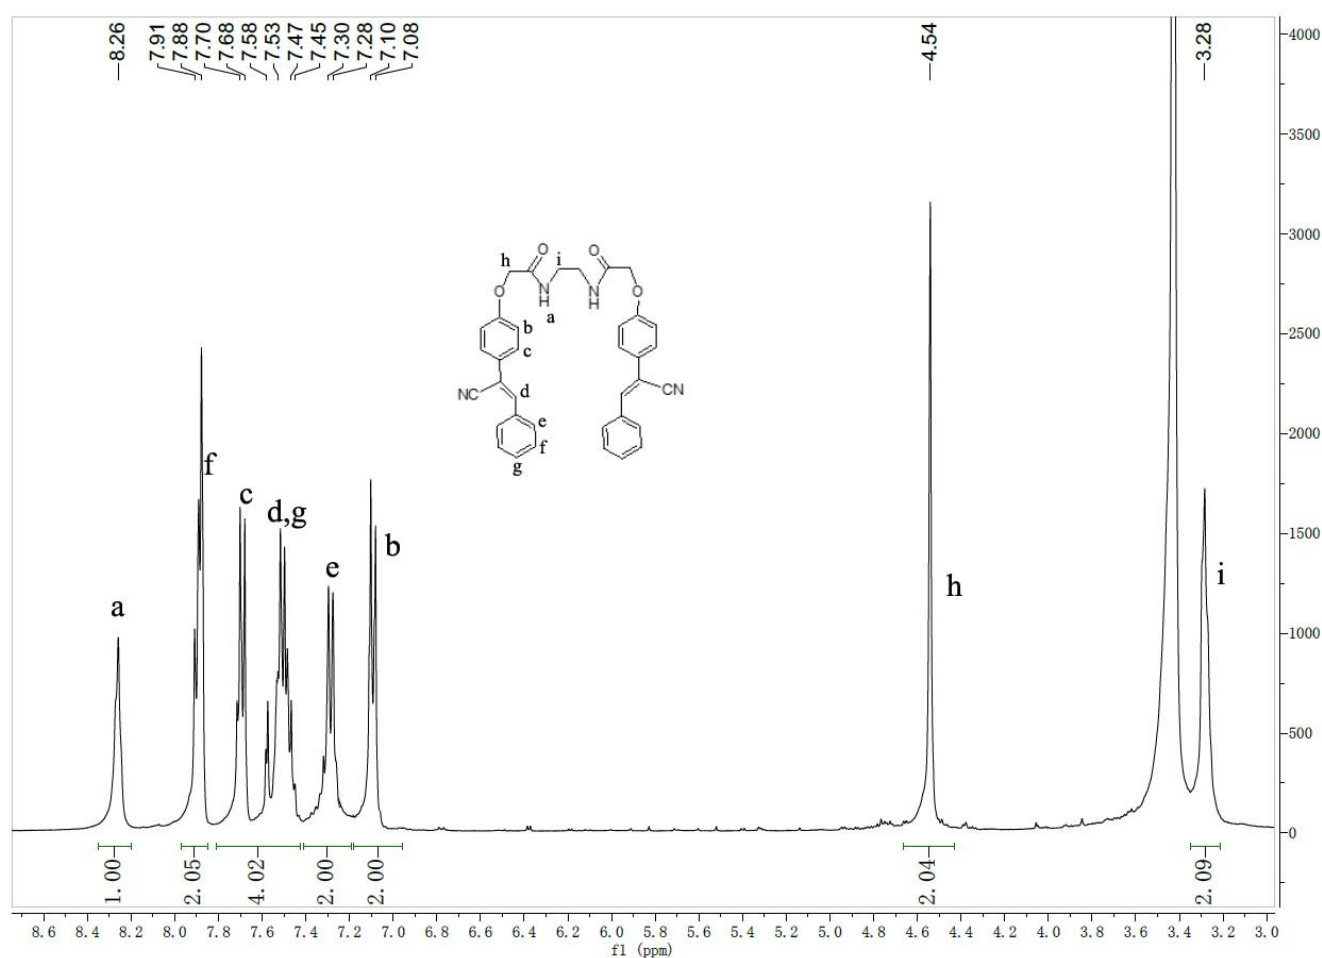

Figure S1. The <sup>1</sup>H NMR spectrum of compound **3a**

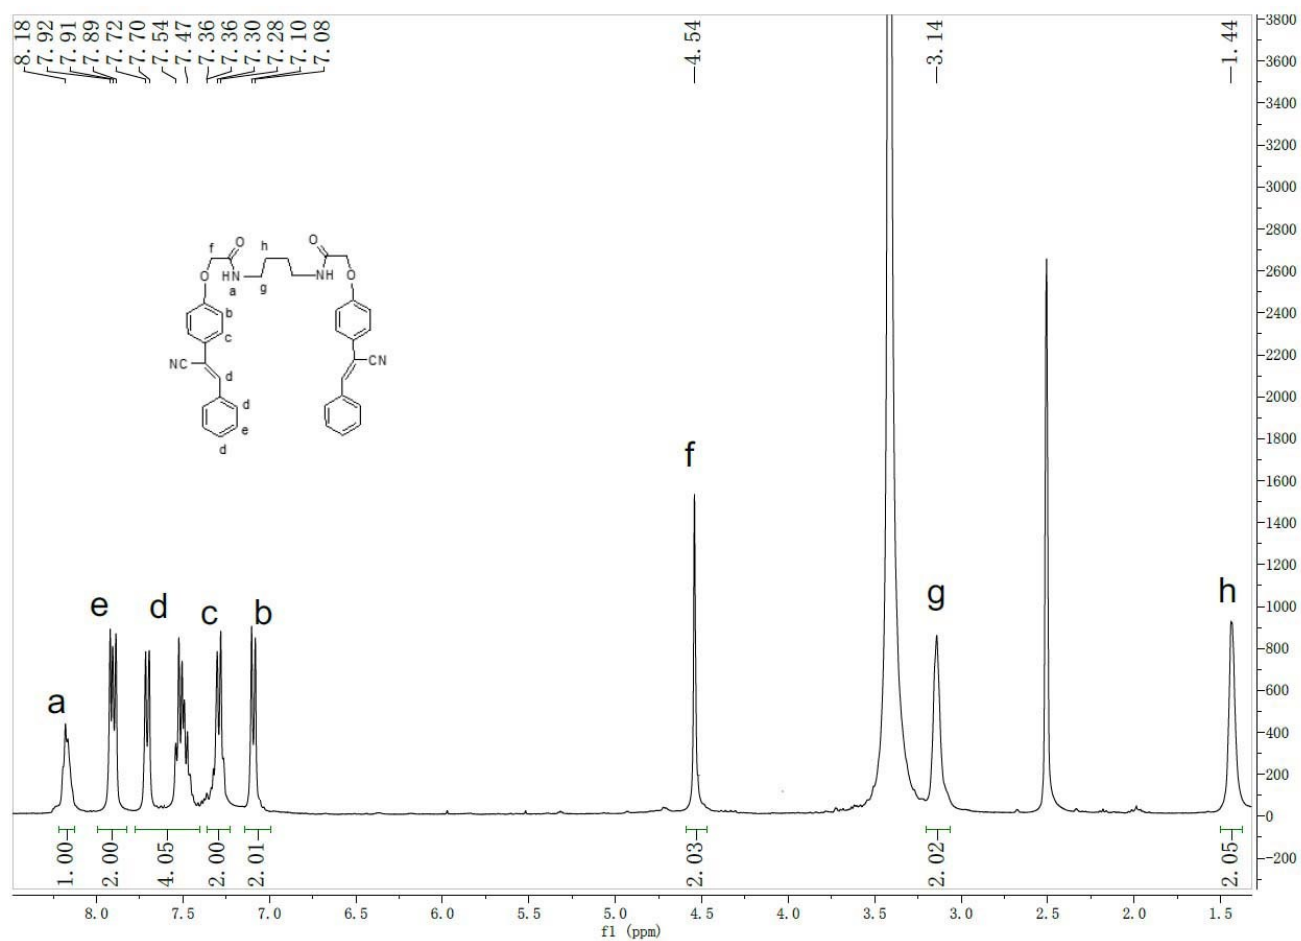

Figure S2. The  $^1\text{H}$  NMR spectrum of compound **3b**

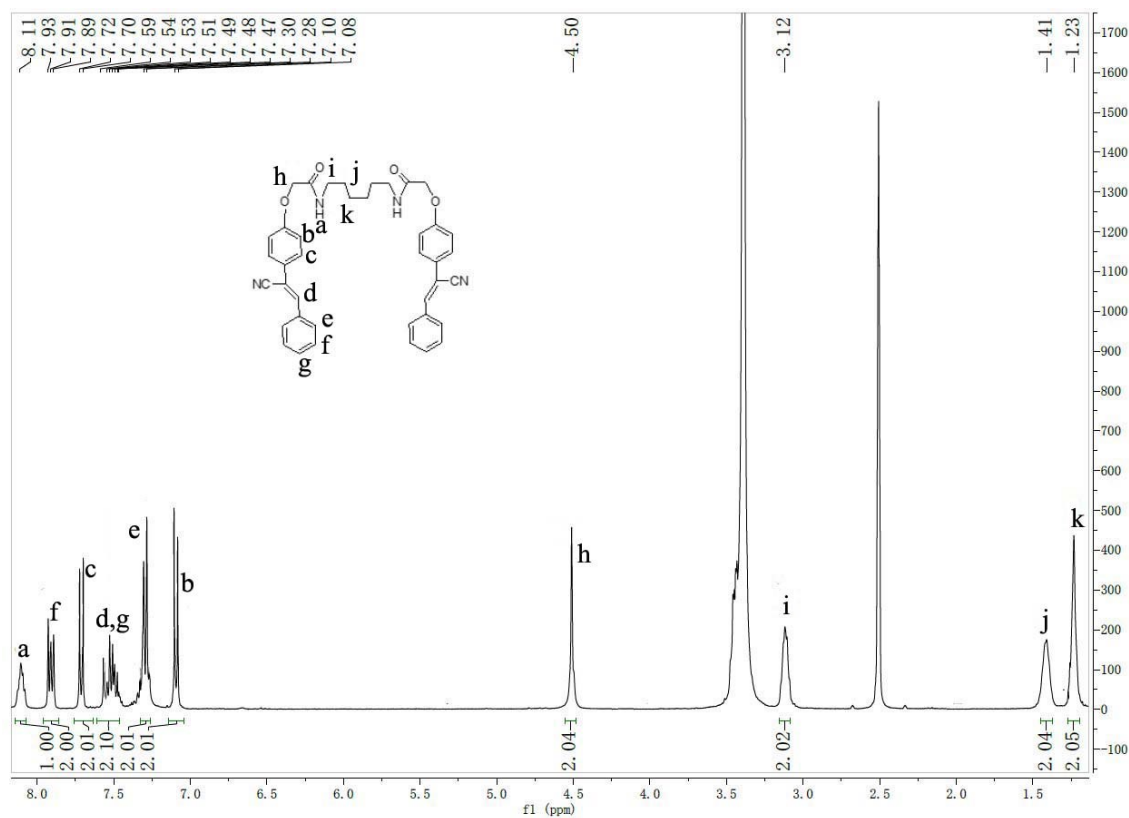

Figure S3. The  $^1\text{H}$  NMR spectrum of compound **3c**

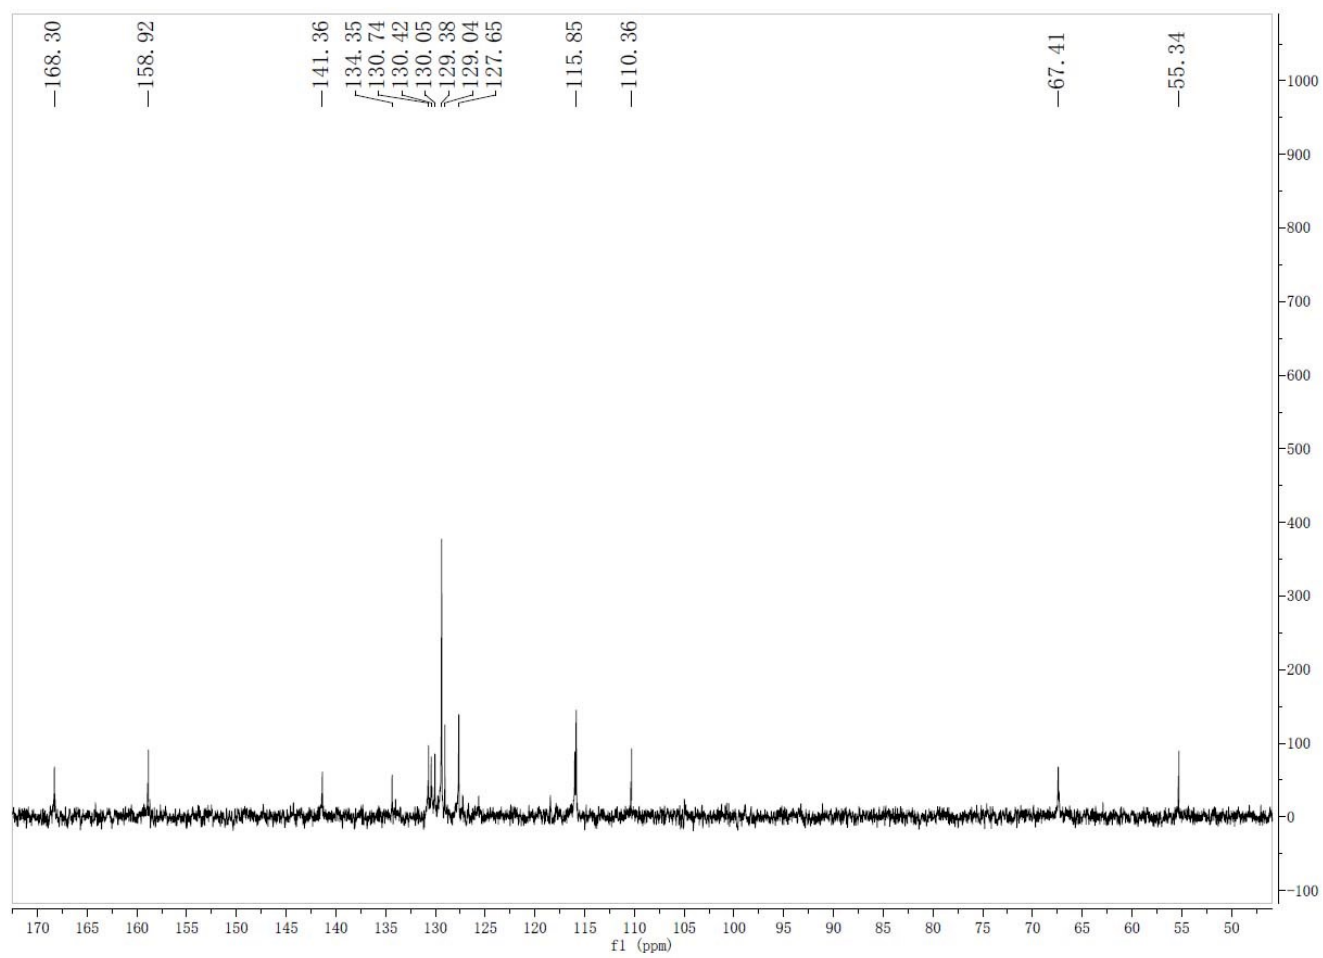

Figure S4. The  $^{13}\text{C}$  NMR spectrum of compound **3a**

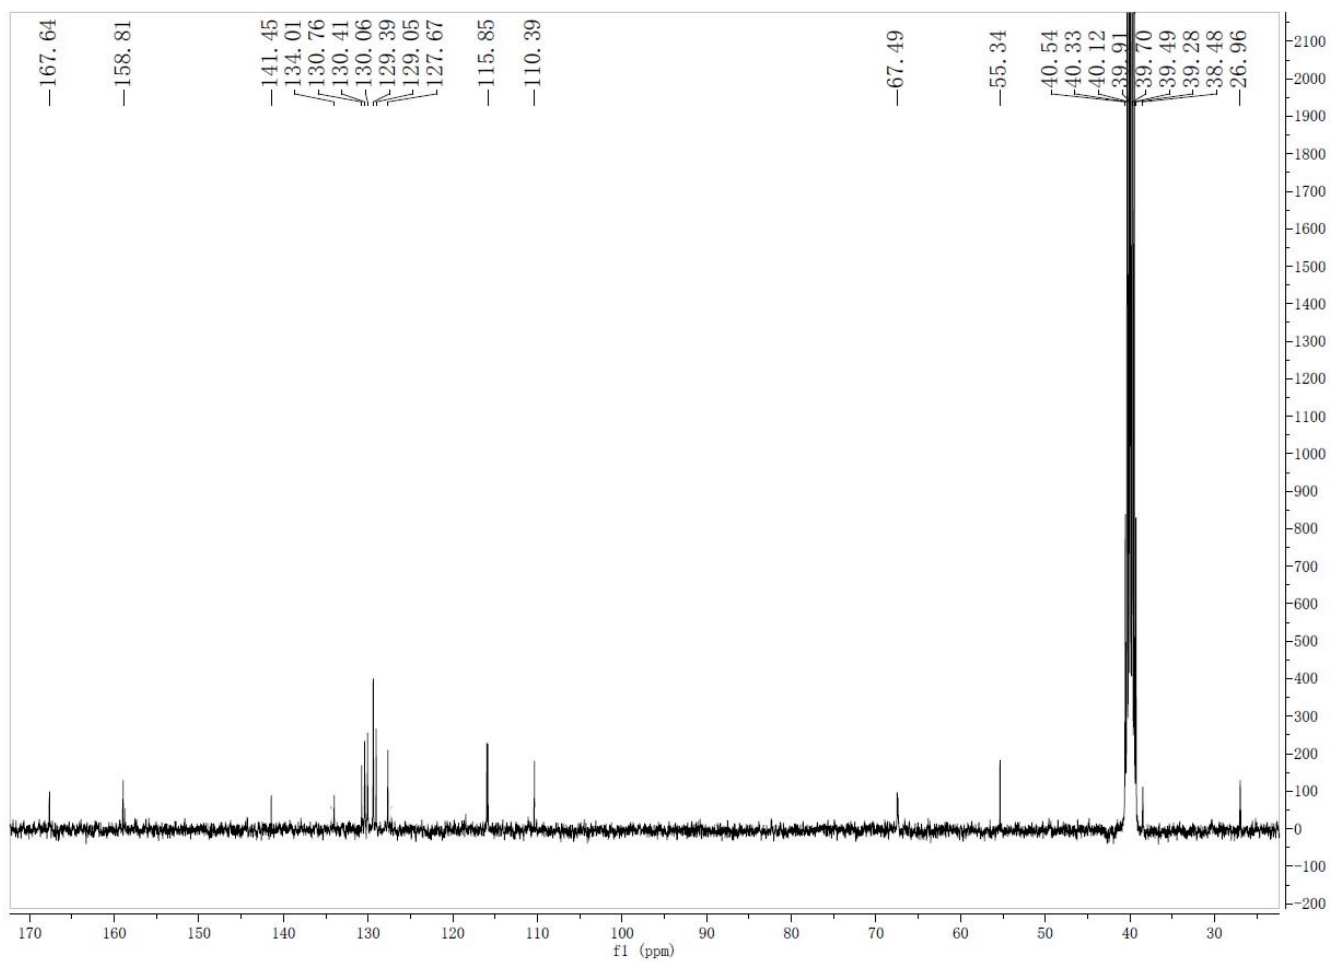

Figure S5. The  $^{13}\text{C}$  NMR spectrum of compound **3b**

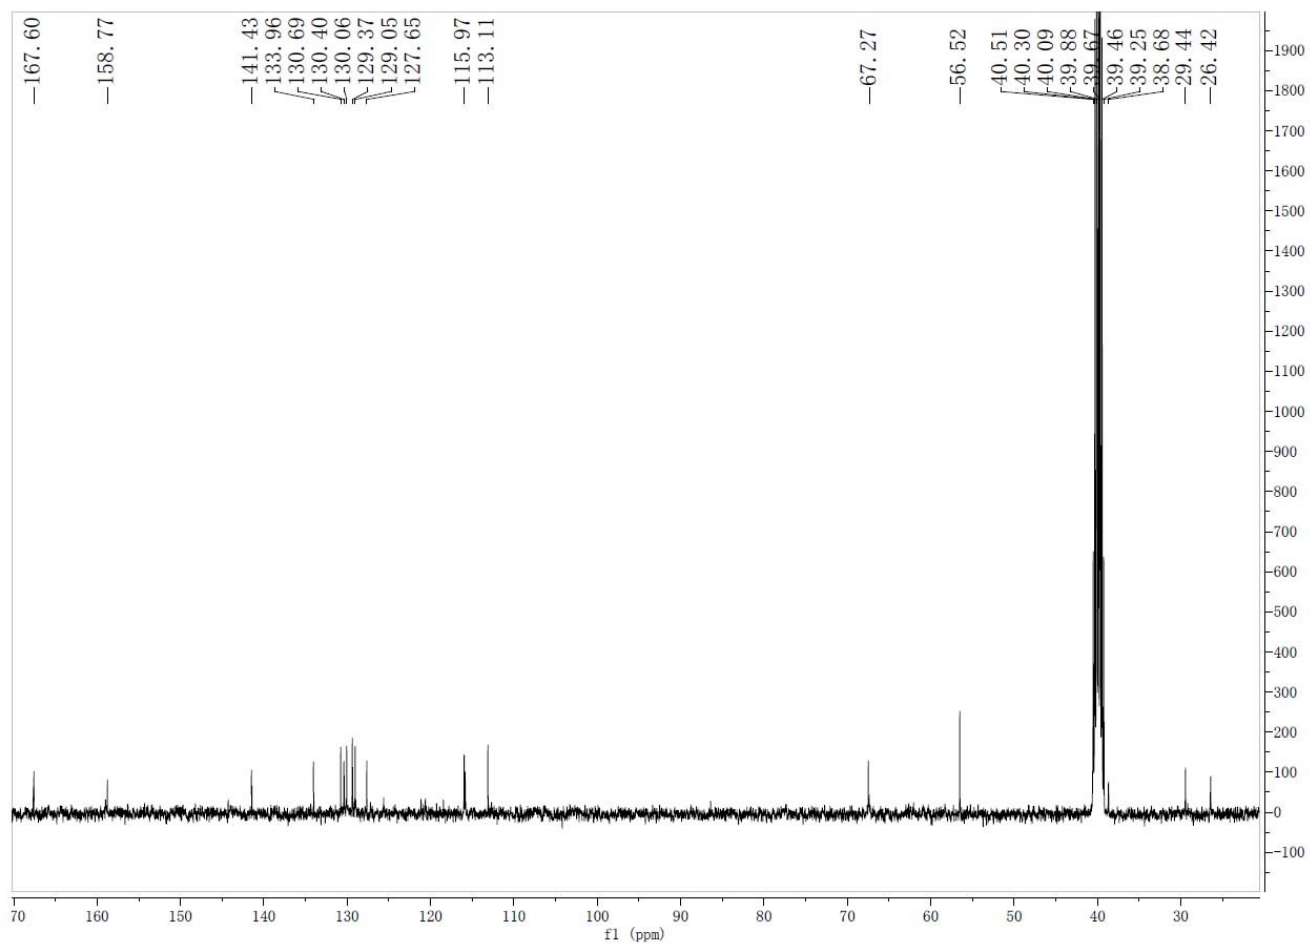

Figure S6. The  $^{13}\text{C}$  NMR spectrum of compound 3c

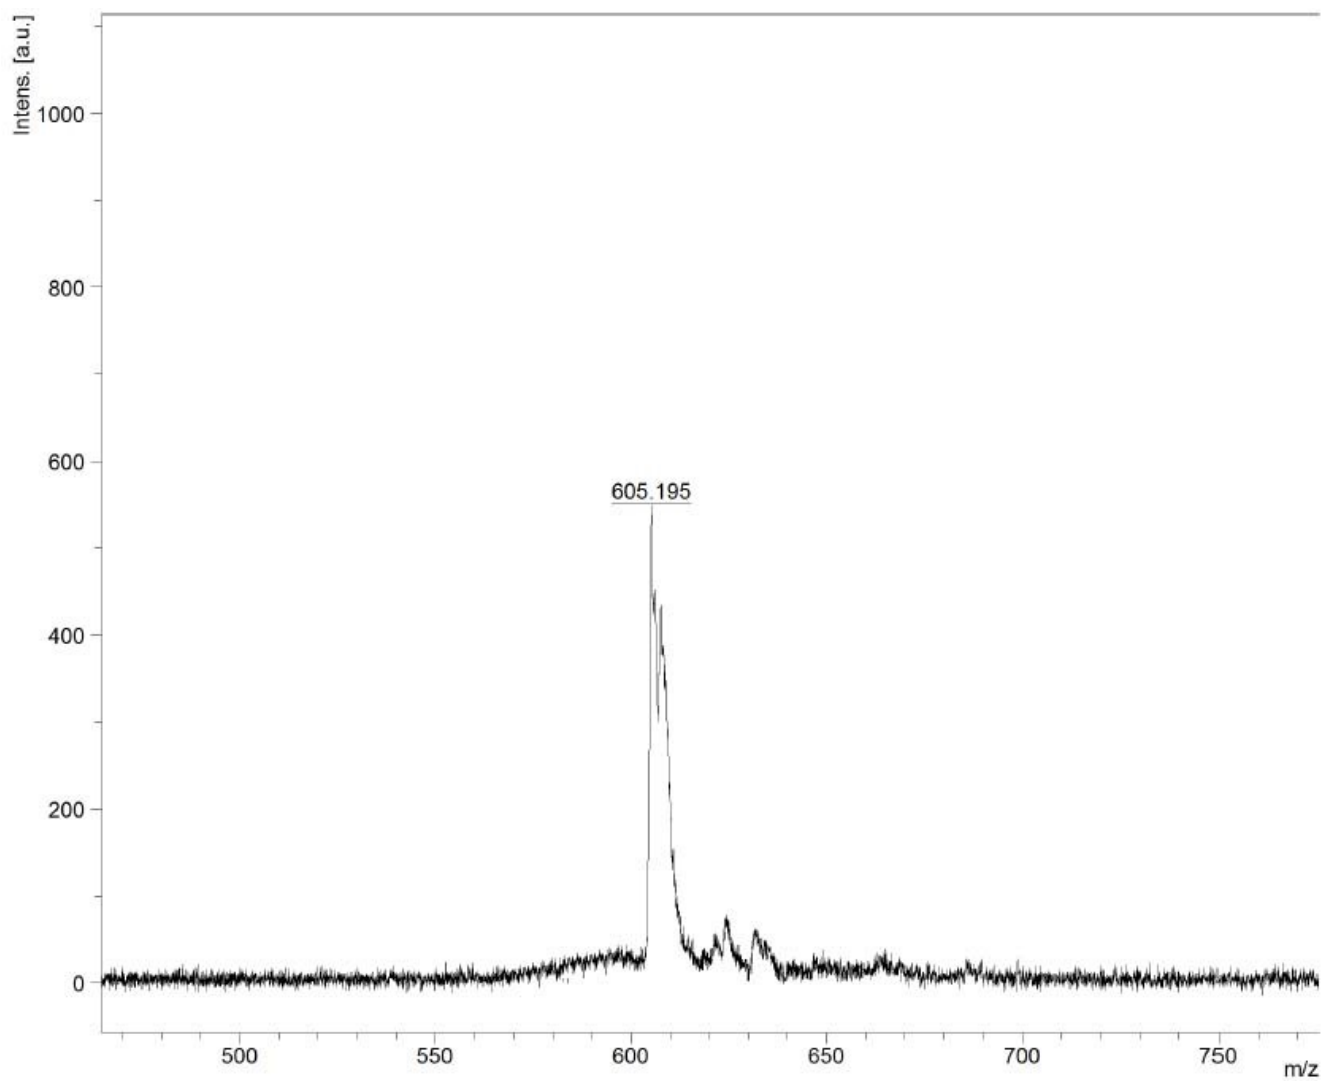

Figure S7. MALDI-MS spectrum of compound **3a**



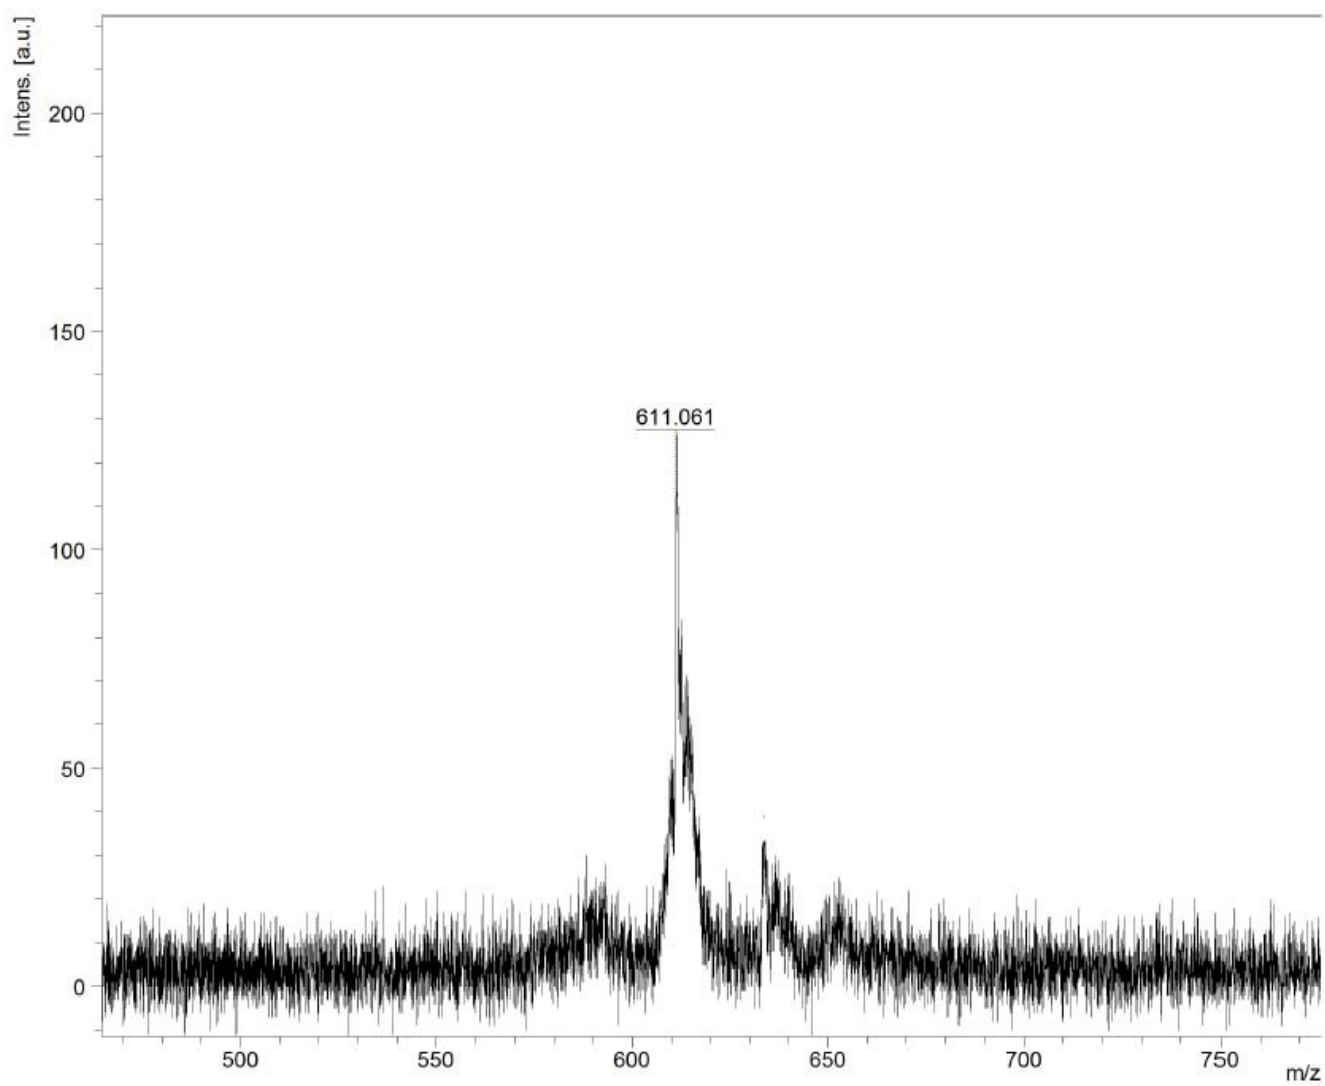

Figure S8. MALDI-MS spectrum of compound **3b**

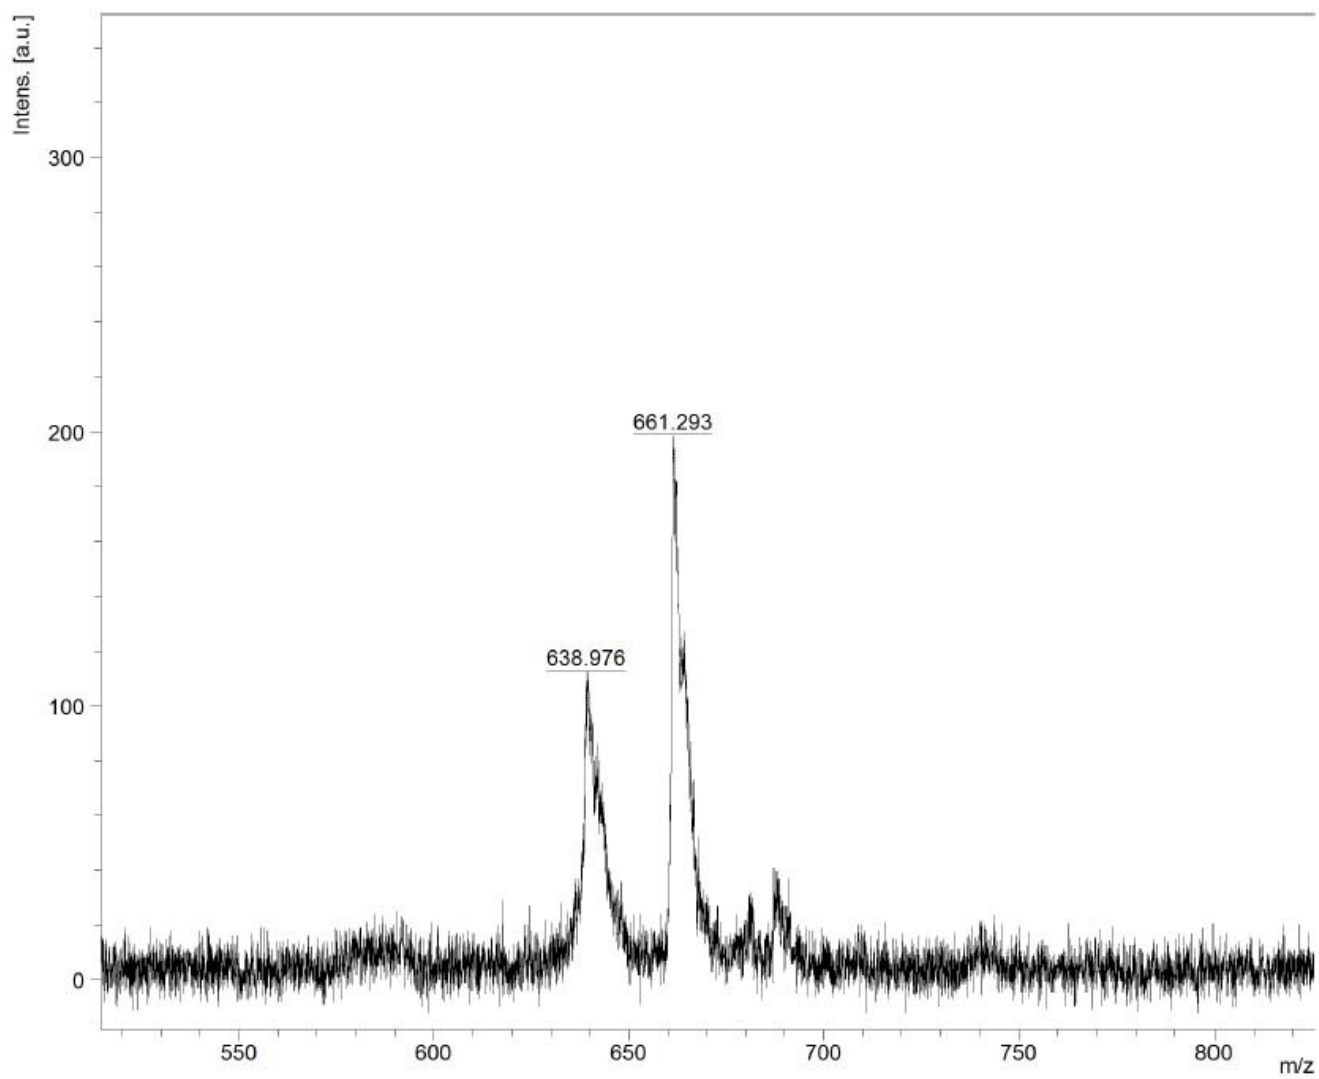

Figure S9. MALDI-MS spectrum of compound **3c**

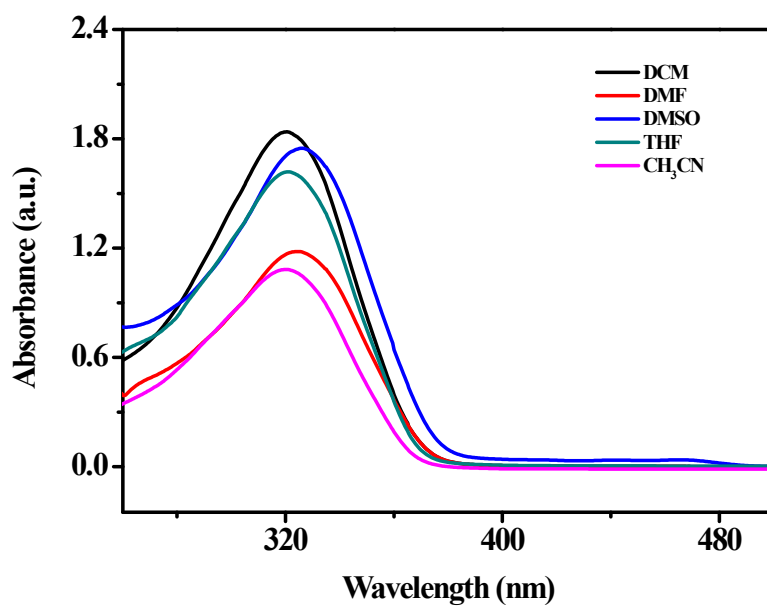

**Figure S10** The UV-Vis absorption spectra of compound **3a** in different solvents ( $1.0 \times 10^{-5}$  M)

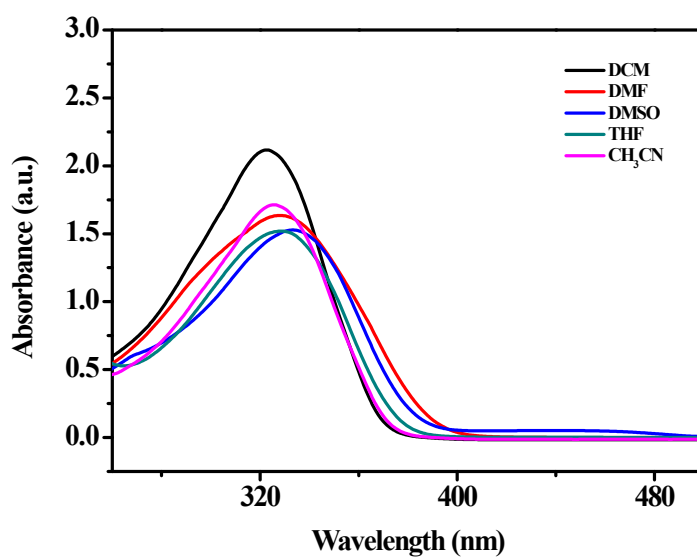

**Figure S11** The UV-Vis absorption spectra of compound **3b** in different solvents ( $1.0 \times 10^{-5}$  M)

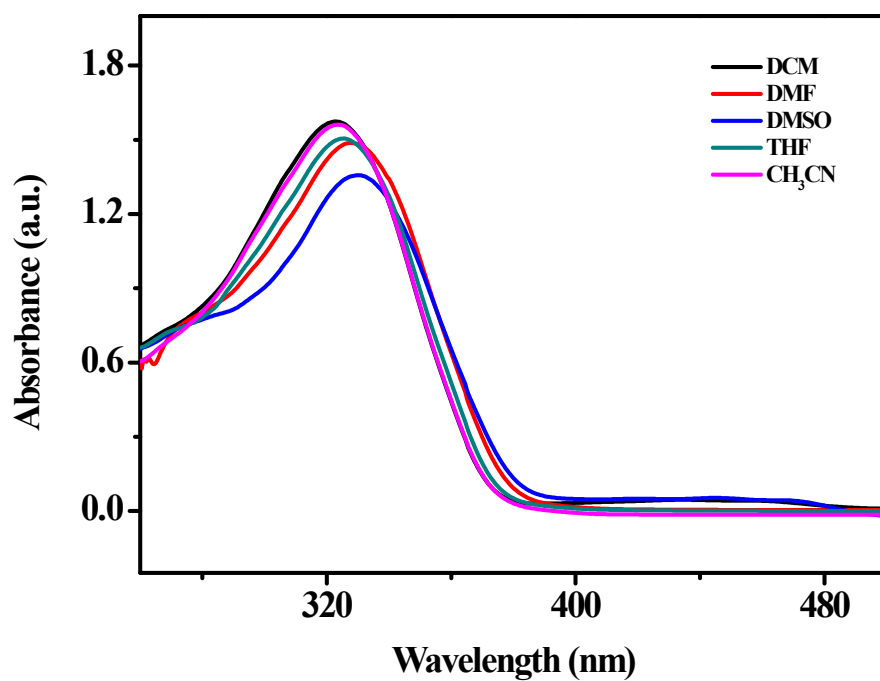

**Figure S12** The UV-Vis absorption spectra of compound **3c** in different solvents ( $1.0 \times 10^{-5}$  M)

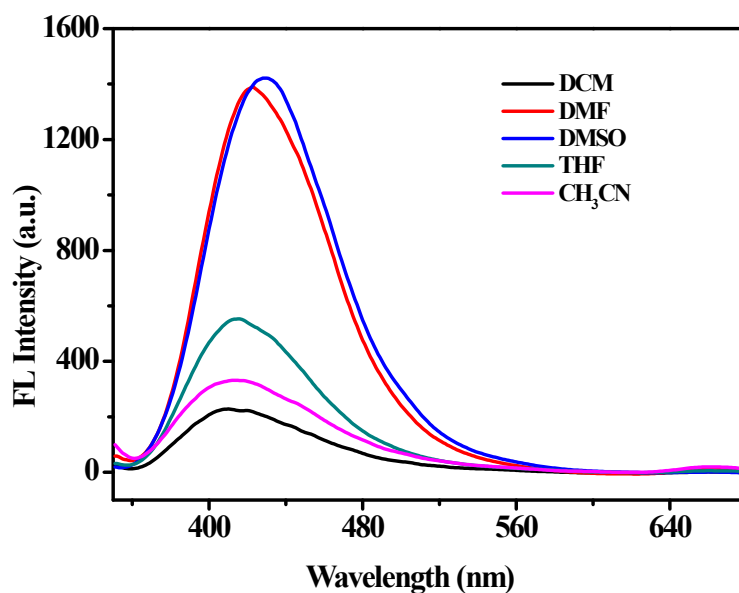

**Figure S13** The emission spectra of compound **3a** in different solvents ( $1.0 \times 10^{-5}$  M) with the excitation wavelength of 320 nm.

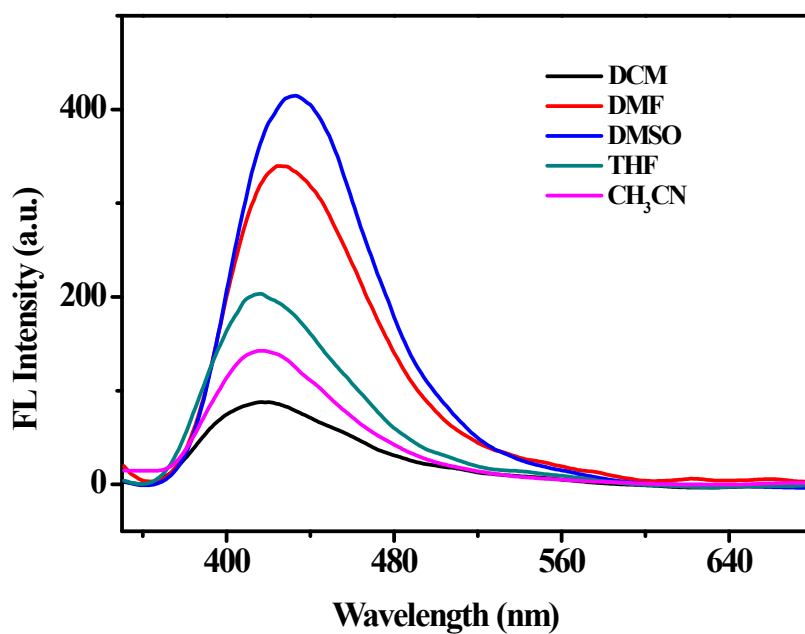

**Figure S14** The emission spectra of compound **3b** in different solvents ( $1.0 \times 10^{-5} \text{M}$ ) with the excitation wavelength of 320 nm.

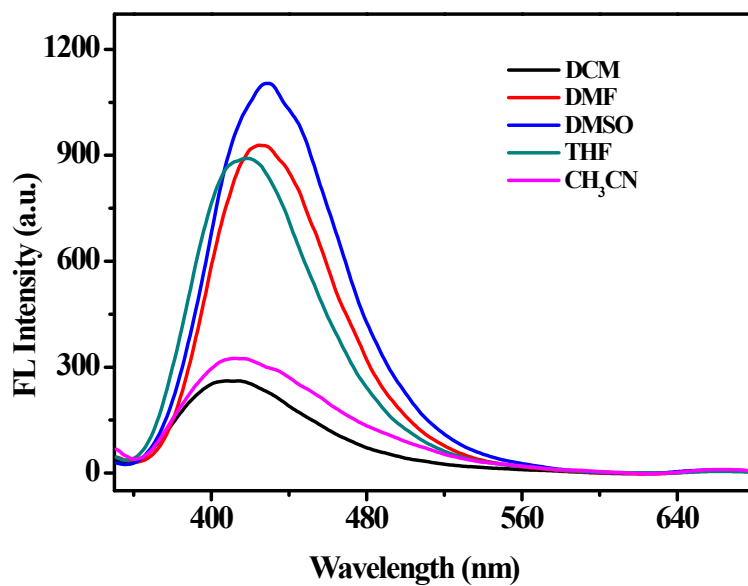

**Figure S15** The emission spectra of compound **3c** in different solvents ( $1.0 \times 10^{-5} \text{M}$ ) with the excitation wavelength of 320 nm.

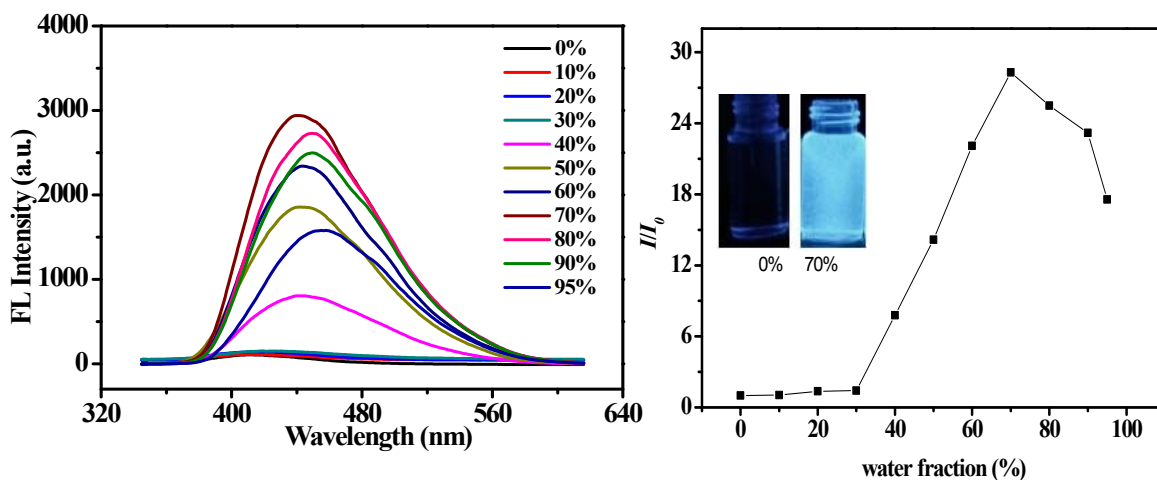

**Figure S16** (left) The emission spectra of compound **3a** in H<sub>2</sub>O/THF mixtures with different water fractions ( $\lambda_{\text{ex}} = 320 \text{ nm}$ ,  $1.0 \times 10^{-6} \text{ M}$ ); (right) The changes in peak intensities with different water fractions in H<sub>2</sub>O/THF mixtures ( $I$  and  $I_0$  were the fluorescence intensities in H<sub>2</sub>O/THF mixtures with different water fractions and in pure THF solution); Inserted: the corresponding fluorescence images.

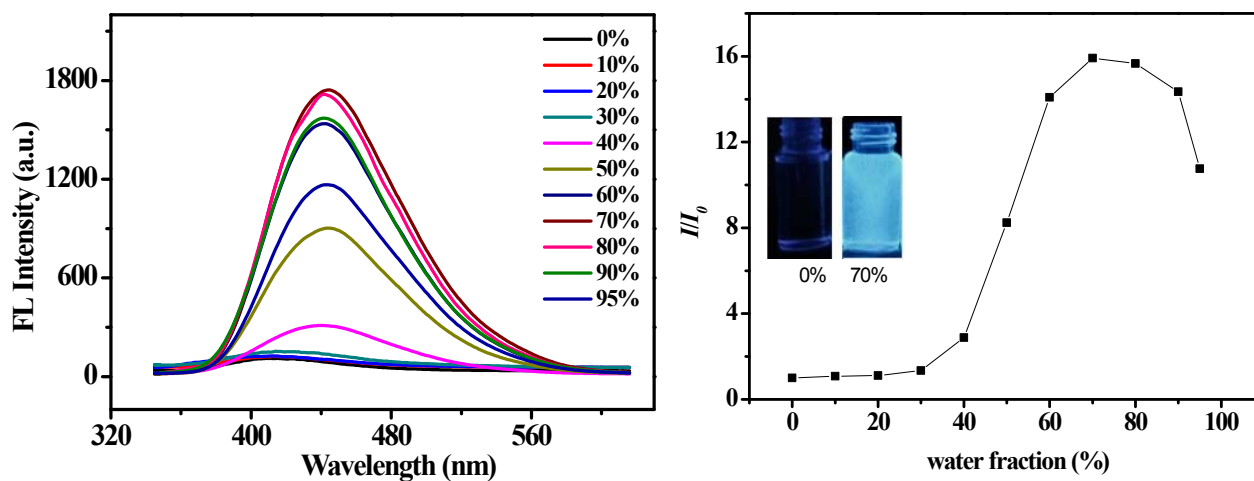

**Figure S17** (left) The emission spectra of compound **3c** in H<sub>2</sub>O/THF mixtures with different water fractions ( $\lambda_{\text{ex}} = 320 \text{ nm}$ ,  $1.0 \times 10^{-6} \text{ M}$ ); (right) The changes in peak intensities with different water fractions in H<sub>2</sub>O/THF mixtures ( $I$  and  $I_0$  were the fluorescence intensities in H<sub>2</sub>O/THF mixtures with different water fractions and in pure THF solution); Inserted: the corresponding fluorescence images.

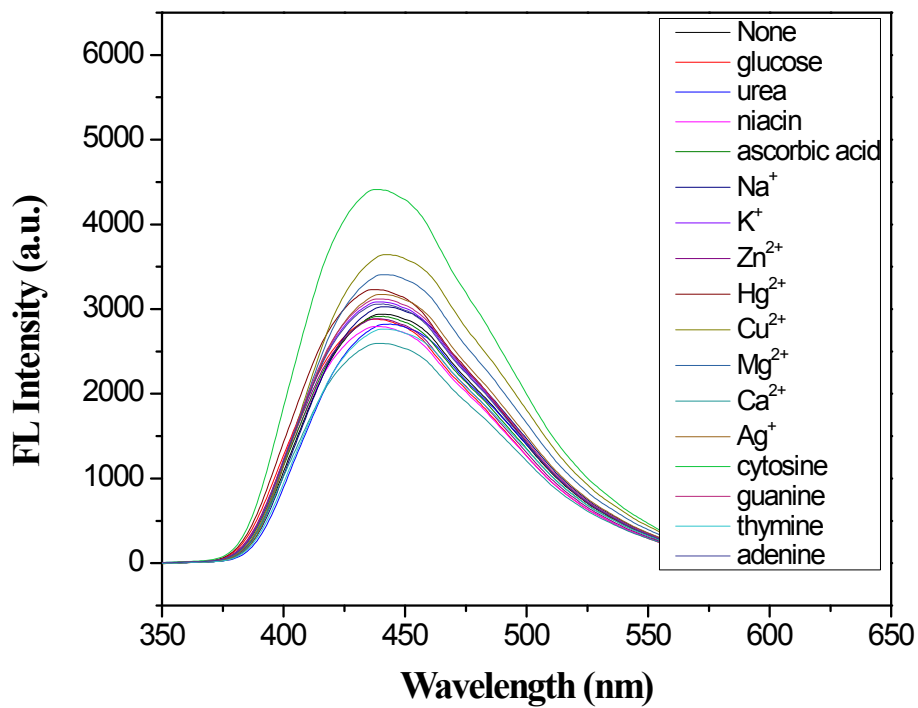

**Figure S18** Fluorescence spectra of the compound **3a** in H<sub>2</sub>O/THF mixtures with 70% of H<sub>2</sub>O ( $\lambda_{\text{ex}} = 320$  nm,  $1.0 \times 10^{-6}$  M) in the presence of various metal ions and biomolecules ( $1.0 \times 10^{-6}$  M).

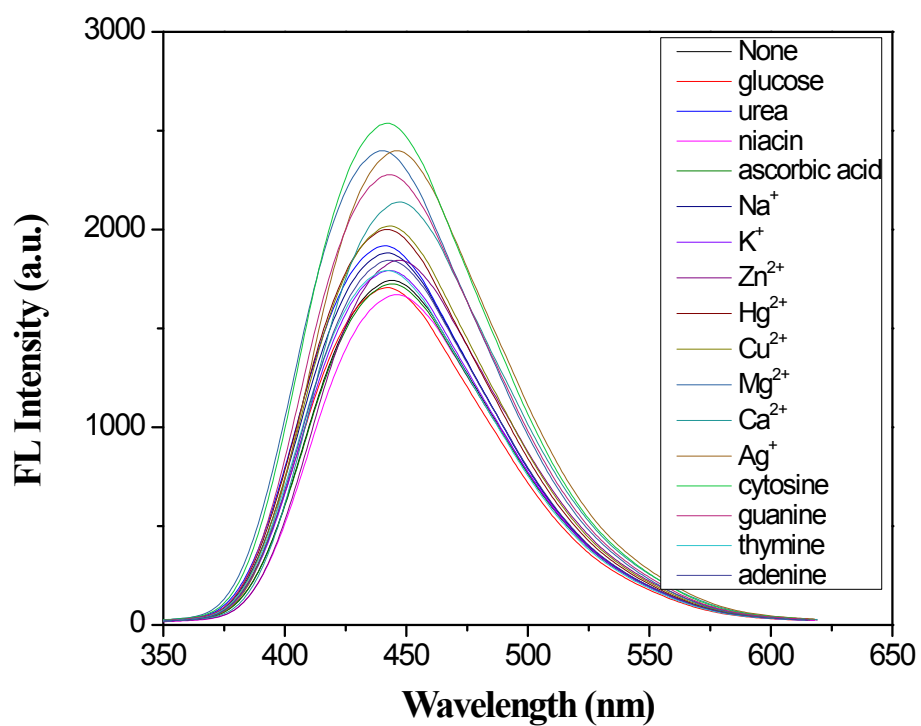

**Figure S19** Fluorescence spectra of the compound **3c** in H<sub>2</sub>O/THF mixtures with 70% of H<sub>2</sub>O ( $\lambda_{\text{ex}} = 320$  nm,  $1.0 \times 10^{-6}$  M) in the presence of various metal ions and biomolecules ( $1.0 \times 10^{-6}$  M).



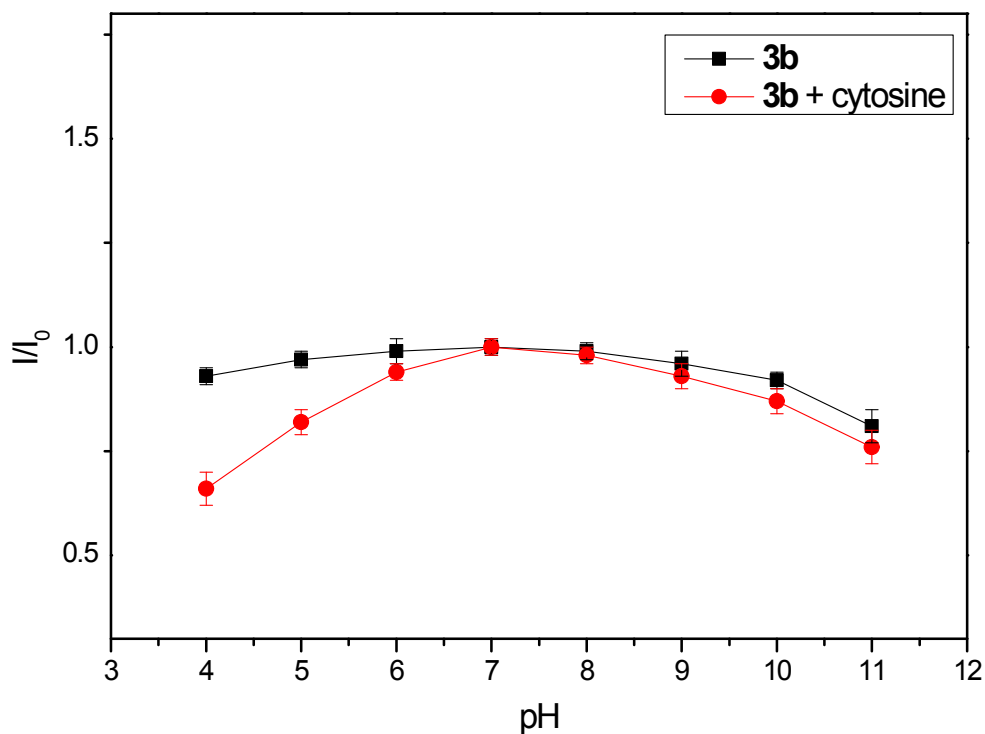

**Figure S20** The influence of pH on the maximum fluorescence intensities of **3b** and **3b** with cytosine in H<sub>2</sub>O/THF mixtures with 70% of H<sub>2</sub>O ( $\lambda_{\text{ex}} = 320 \text{ nm}$ ,  $1.0 \times 10^{-6} \text{ M}$ ).  $I_0$  was the fluorescence intensities of **3b** or **3b** with cytosine at pH = 7,  $I$  were the fluorescence intensities of **3b** or **3b** with cytosine at corresponding pH values.

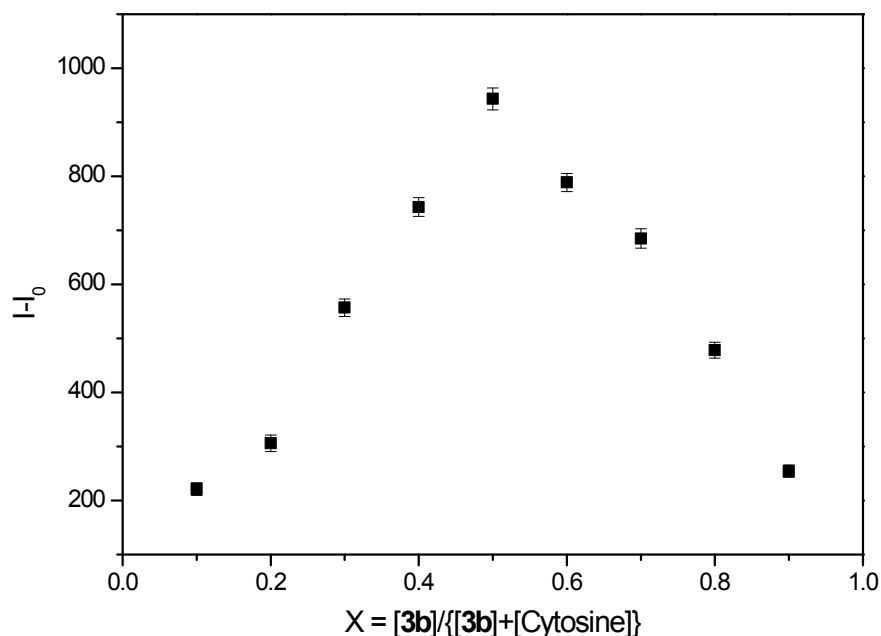

**Figure S21** The Job's plot of compound **3b** with cytosine in H<sub>2</sub>O/THF mixtures with 70% of H<sub>2</sub>O (The total concentration was  $1.0 \times 10^{-6} \text{ M}$ ,  $I_0$  and  $I$  were the fluorescence intensity of compound **3b** before and after sensing cytosine)

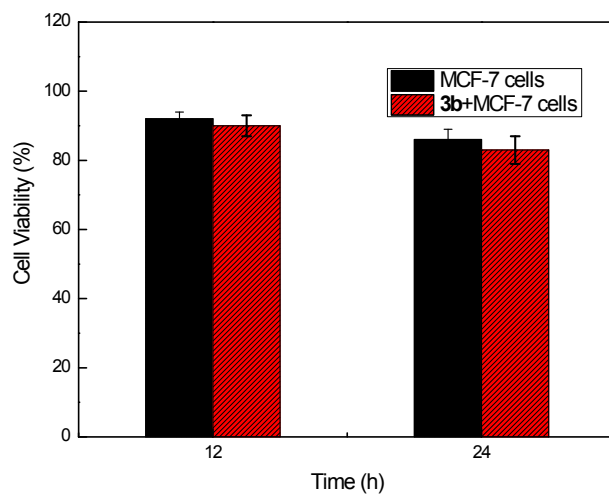

**Figure S22** Cell viability of MCF-7 cells before and after incubated with compound **3b** ( $1.0 \times 10^{-6}$  M) for 12 h and 24 h.

**Table S1** Comparison of other methods for sensing cytosine

| Method                                                       | LOD          | Reference | Selectivity    |
|--------------------------------------------------------------|--------------|-----------|----------------|
| Surface plasmon resonance sensor                             | 10 nM        | [22]      | well           |
| Electrocatalysis of uric acid                                | 9.31 $\mu$ M | [16]      | well           |
| Electroanalysis of functionalized graphene                   | 0.23 $\mu$ M | [17]      | well           |
| Glassy carbon electrode confined conducting polymer          | 65 nM        | [18]      | Not meentioned |
| Graphite-Based Nanocomposite Electrochemical Sensor          | 0.9 $\mu$ M  | [13]      | weak           |
| fluorescent DNA sensor                                       | 5.5 nM       | [24]      | Well           |
| fluorescence sensor of thiophene-based organic nanoparticles | 2.1 nM       | [23]      | weak           |
| AIE fluorescence sensor                                      | 0.10 $\mu$ M | This work | well           |

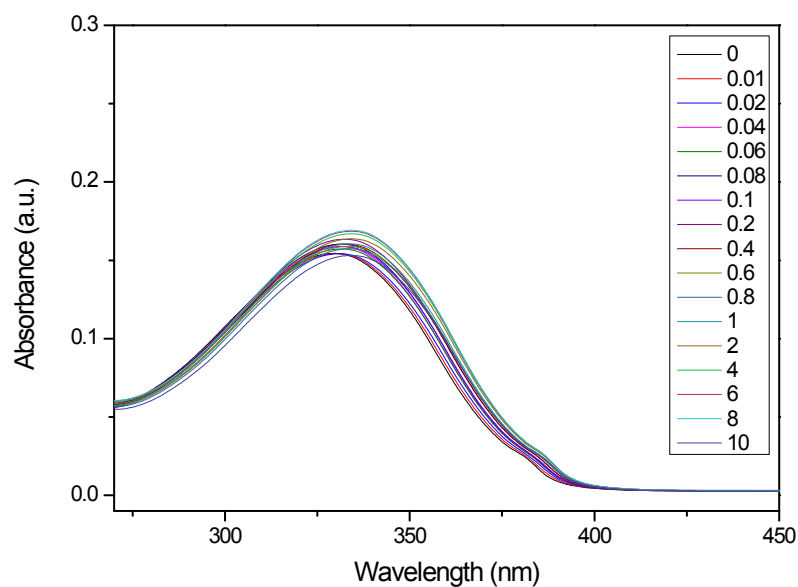

**Figure S23** The UV-Vis absorption spectra of compound **3b** in H<sub>2</sub>O/THF mixtures with 70% of H<sub>2</sub>O ( $1.0 \times 10^{-6}$  M) in the presence of various equivalent concentrations of cytosine.

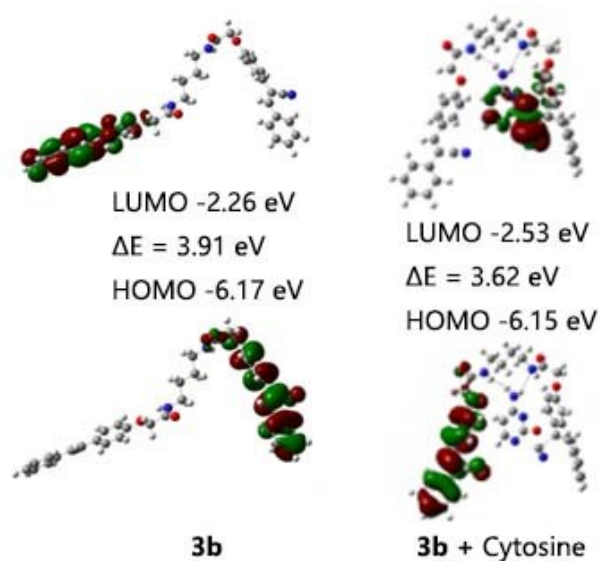

**Figure S24** The Molecular theoretical orbital amplitude plots of HOMO and LUMO energy levels of compound **3b** before and after binding cytosine
